# Supplementary material for: MicroRNA-125b Functions as a Tumor Suppressor in Hepatocellular Carcinoma Cells
Source: PubMed Central journal article supplement (PMC3430264; doi:10.3390/ijms13078762), 2012-07-16
Supplement: ijms-13-08762-s001.pdf [file ijms-13-08762-s001.pdf]

# MicroRNA-125b Functions as a Tumor Suppressor in Hepatocellular Carcinoma Cells

## Supplemental Information

**Table S1.** Relationship between clinicopathological factors and low expression of miR-125b in HCC tissues.

| Variables          | Patients, <i>n</i>               |                                  | <i>p</i> value |
|--------------------|----------------------------------|----------------------------------|----------------|
|                    | Low miR-125b<br>( <i>n</i> = 26) | High miR-125b<br>( <i>n</i> = 6) |                |
| <b>Gender</b>      |                                  |                                  | 0.62           |
| male               | 20                               | 4                                |                |
| female             | 6                                | 2                                |                |
| <b>Age</b>         |                                  |                                  | 0.67           |
| <57                | 10                               | 3                                |                |
| ≥57                | 16                               | 3                                |                |
| <b>AFP (ng/mL)</b> |                                  |                                  | 1              |
| <100               | 11                               | 2                                |                |
| ≥100               | 15                               | 4                                |                |
| <b>Grading</b>     |                                  |                                  | 0.126          |
| G1                 | 5                                | 3                                |                |
| G2                 | 5                                | 2                                |                |
| G3                 | 16                               | 1                                |                |

**Table S2.** Average values from the cell cycle analysis of HepG2 cells transfected with miR-125b mimic or Scramble.

| <i>Samples</i>        | <b>Percentage of cells in different phases of cell cycle</b> |
|-----------------------|--------------------------------------------------------------|
| <i>untreated</i>      | G1: 45.7 ± 2.2%                                              |
|                       | S: 43.7 ± 0.8%                                               |
| <i>Scramble</i>       | G1: 45.3 ± 3.0%                                              |
|                       | S: 37.8 ± 2.0%                                               |
| <i>miR-125b mimic</i> | G1: 54.8 ± 1.2%                                              |
|                       | S: 31.5 ± 1.2%                                               |

**Table S3.** Average values from the cell cycle analysis of HepG2 cells transfected with siRNAs or negative control.

| <i>Samples</i>    | <b>Percentage of cells in different phases of cell cycle</b> |
|-------------------|--------------------------------------------------------------|
| <i>untreated</i>  | G1: 42.5 ± 1.8%<br>S: 38.8 ± 1.4%                            |
| <i>si_control</i> | G1: 49.2 ± 3.1%<br>S: 35.5 ± 2.2%                            |
| <i>si_Mcl-1</i>   | G1: 56.9 ± 2.3%<br>S: 27.7 ± 0.9%                            |
| <i>untreated</i>  | G1: 42.2 ± 3.9%<br>S: 42.0 ± 2.4%                            |
| <i>si_control</i> | G1: 41.6 ± 1.8%<br>S: 40.5 ± 1.1%                            |
| <i>si_IL6R</i>    | G1: 56.1 ± 2.3%<br>S: 25.3 ± 1.2%                            |

**Table S4.** Average values from the cell cycle analysis of HepG2 cells in miR-125b rescue assay.

| <i>Samples</i>                      | <b>Percentage of cells in different phases of cell cycle</b> |
|-------------------------------------|--------------------------------------------------------------|
| <i>Scramble + pcDNA-Mcl-1</i>       | G1: 40.3 ± 1.6%<br>S: 51.9 ± 2.1%                            |
| <i>miR-125b mimic + pcDNA-empty</i> | G1: 55.6 ± 2.4%<br>S: 39.0 ± 2.1%                            |
| <i>miR-125b mimic + pcDNA-Mcl-1</i> | G1: 42.8 ± 1.9%<br>S: 47.5 ± 2.1%                            |
| <i>Scramble + pcDNA-Mcl-1</i>       | G1: 29.8 ± 2.0%<br>S: 56.9 ± 2.9%                            |
| <i>miR-125b mimic + pcDNA-empty</i> | G1: 49.2 ± 1.3%<br>S: 43.3 ± 1.4%                            |
| <i>miR-125b mimic + pcDNA-Mcl-1</i> | G1: 31.9 ± 1.4%<br>S: 57.4 ± 1.7%                            |

**Table S5.** Description of 32 HCC cases.

| <b>Sample ID</b> | <b>Gender</b> | <b>Age</b> | <b>AFP (ng/mL)</b> | <b>Grading</b> |
|------------------|---------------|------------|--------------------|----------------|
| 1                | Male          | 51         | 4412.65            | G3             |
| 2                | Male          | 55         | 84.51              | G3             |
| 3                | Male          | 39         | 387.54             | G3             |
| 4                | Male          | 42         | 694.11             | G3             |
| 5                | Female        | 47         | 1105.21            | G3             |
| 6                | Male          | 58         | 16.47              | G3             |
| 7                | Male          | 62         | 426.58             | G1             |
| 8                | Male          | 59         | 55.43              | G1             |
| 9                | Female        | 52         | 6.97               | G3             |
| 10               | Male          | 55         | 871.34             | G2             |
| 11               | Male          | 46         | 4349.55            | G2             |
| 12               | Female        | 57         | 644.12             | G3             |
| 13               | Male          | 54         | 16.54              | G3             |
| 14               | Male          | 64         | 6.98               | G2             |
| 15               | Male          | 63         | 7.39               | G1             |
| 16               | Male          | 60         | 846.97             | G1             |
| 17               | Female        | 59         | 8.46               | G1             |
| 18               | Female        | 47         | 8.43               | G2             |
| 19               | Male          | 58         | 1156.49            | G3             |
| 20               | Male          | 64         | 8789.64            | G3             |
| 21               | Male          | 68         | 10023.37           | G3             |
| 22               | Male          | 64         | 184.56             | G2             |
| 23               | Male          | 64         | 546.25             | G3             |
| 24               | Female        | 59         | 1698.44            | G3             |
| 25               | Male          | 62         | 12.10              | G3             |
| 26               | Male          | 67         | 8.49               | G3             |
| 27               | Male          | 56         | 75.64              | G1             |
| 28               | Male          | 57         | 4641.23            | G1             |
| 29               | Female        | 52         | 144.29             | G2             |
| 30               | Female        | 46         | 165.47             | G1             |
| 31               | Male          | 66         | 138.62             | G2             |
| 32               | Male          | 67         | 83.05              | G3             |

**Table S6.** Primers used for DNA cloning and qRT-PCR, and probes used for Northern blot.

| <b>Primers for DNA cloning</b>  | <b>Sequence (5'–3')</b>                                 |
|---------------------------------|---------------------------------------------------------|
| miR-125b reporter up            | CTAGATCACAAGTTAGGGTCTCAGGGAA                            |
| miR-125b reporter down          | CGCGTTCCTGAGACCCTAACTTGTGAT                             |
| Mcl-1_WT up                     | TCTAGACCCAATTCATTAGGTATGACTG                            |
| Mcl-1_WT down                   | ACGCGTGTTAGGGAAACACACTACATTTG                           |
| Mcl-1_MUT up                    | CTGTCCCAAAAACATGCAGTCCTCTAG                             |
| Mcl-1_MUT down                  | TTTTGGGACAGAGAAGCGTAAGAC                                |
| IL6R_WT up                      | TCTAGAGCTAGAGTGAACCTGGGCCAC                             |
| IL6R_WT down                    | ACGCGTCACAGCGAATATTGGATATTCCACC                         |
| IL6R_MUT up                     | GTCCCCCTGGTCGTTTTCAACAGA AT                             |
| IL6R_MUT down                   | CAGGGGGACAGATACTGTATTATTC                               |
| <b>Primers for qRT-PCR</b>      |                                                         |
| miR-125b RT                     | GTCGTATCCAGTGCAGGGTCCGAGGTATTCGCAC<br>TGGATACGACTCACAAG |
| miR-125b up                     | GCGCTCCCTGAGACCCTAA                                     |
| miR-125b down                   | CAGTGCAGGGTCCGAGGT                                      |
| U6 snRNA RT                     | AAAATATGGAACGCTTCACGAATTTG                              |
| U6 snRNA up                     | CTCGCTTCGGCAGCACATATACT                                 |
| U6 snRNA down                   | ACGCTTCACGAATTTGCGTGTC                                  |
| <b>Probes for Northern blot</b> |                                                         |
| miR-125b                        | TCACAAGTTAGGGTCTCAGGGA                                  |
| U6 snRNA                        | CACGAATTTGCGTGTCATCCTTGC                                |

All data were obtained from three independent experiments.
